# Supplementary material for: Association between Mitochondrial DNA Copy Number and Neurodevelopmental Outcomes among Black and White Preterm Infants up to Two Years of Age
Source: Preprints.org preprint supplement (doi:10.20944/preprints202404.1905.v1), 2024-04-29
Supplement: Supplementary file 2 [file supplementary]

|  |
| --- |

Supplementary Table 1. Infant NNNS subscale scores

| Variables | Subscale scores |
| --- | --- |
| Nhabit | 6.97 (0.74) |
| Nattention | 4.68 (1.28) |
| Nhandle | 0.44 (0.22) |
| Nqmove | 4.34 (0.59) |
| Nregulation | 4.84 (0.65) |
| Nnooptref | 5.79 (2.09) |
| Nstress | 0.18 (0.07) |
| Narousal | 3.07 (0.59) |
